# Supplementary material for: Gold nanorod@iron oxide core–shell heterostructures: synthesis, characterization, and photocatalytic performance
Source: Royal Society of Chemistry journal article supplement (doi:10.1039/c7nr00141j), 2017-01-01
Supplement: c7nr00141j1.pdf [file c7nr00141j1.pdf]

**Supporting information for**

**Gold nanorod@iron oxide core-shell heterostructures: synthesis,  
characterization, and photocatalytic performance**

Yue Li,<sup>a,b</sup> Junwei Zhao,<sup>b,d</sup> Wenlong You,<sup>c</sup> Danhong Cheng,<sup>a</sup> Weihai Ni<sup>b,c,\*</sup>

- a. Department of Chemistry, College of Sciences, Shanghai University, Shanghai, 200444, China.
- b. Division of i-Lab, Suzhou Institute of Nano-Tech & Nano-Bionics, Chinese Academy of Sciences, Suzhou, Jiangsu, 215123, China.
- c. College of Physics, Optoelectronics and Energy, Soochow University, Suzhou, Jiangsu 215006, China, E-mail: [niweihai@suda.edu.cn](mailto:niweihai@suda.edu.cn)
- d. Materials Science and Engineering School, Luoyang Institute of Science and Technology, Luoyang, Henan, 471023, China.

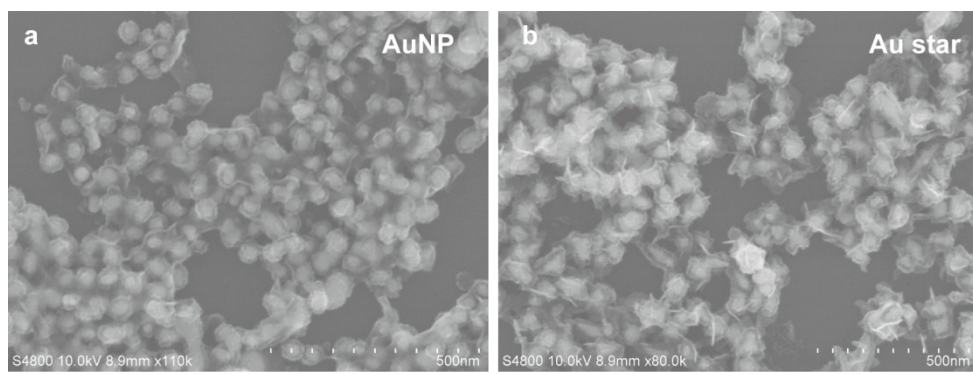

Fig. S1. Coating of  $\text{Fe}_2\text{O}_3$  on other CTAB-capped nanostructures.

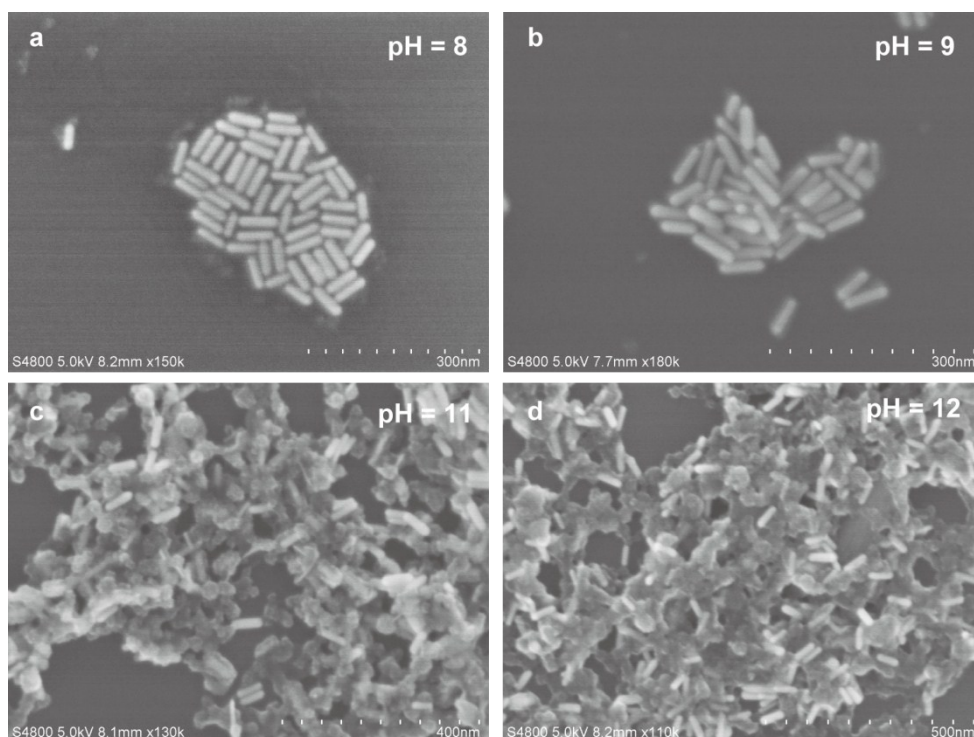

Fig. S2. (a–d) SEM images of AuNR@Fe<sub>2</sub>O<sub>3</sub> nanostructures synthesized at various pHs of 8, 9, 11, and 12, respectively. The CTAB concentration is controlled at 0.2 mM.

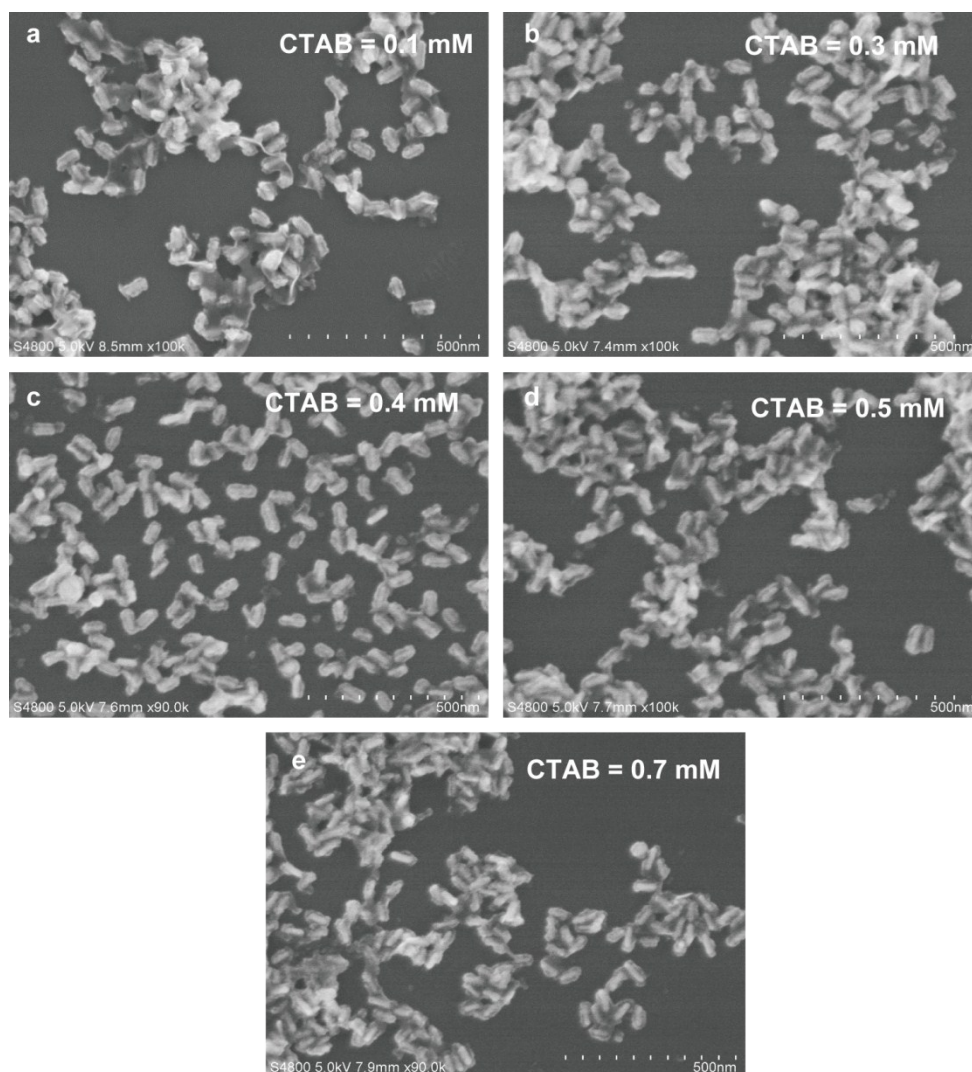

Fig. S3. (a–e) SEM images of AuNR@Fe<sub>2</sub>O<sub>3</sub> nanostructures synthesized at various CTAB concentrations of 0.1, 0.3, 0.4, 0.5, and 0.7 mM, respectively. The pH is controlled at 10.

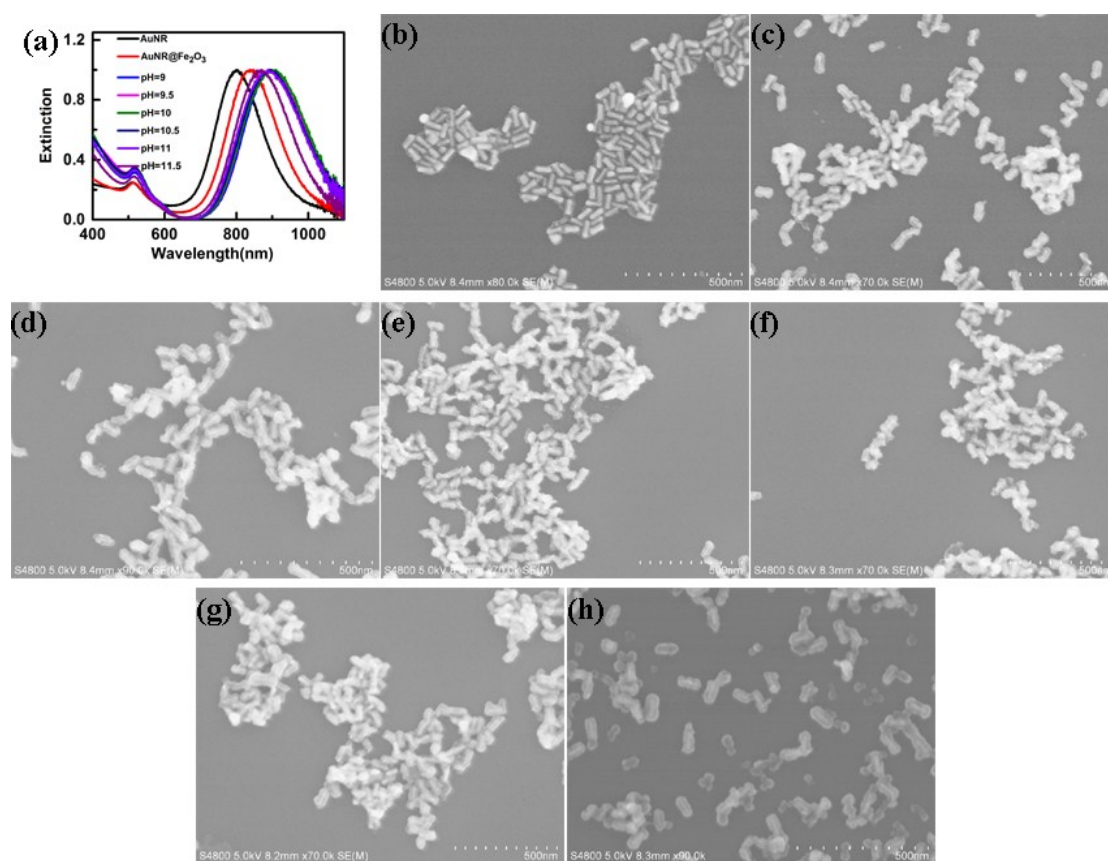

Fig. S4. (a) Normalized extinction spectra recording the encapsulation of Fe<sub>3</sub>O<sub>4</sub> on the surface of AuNR@Fe<sub>2</sub>O<sub>3</sub> nanostructures at various pH values. The CTAB concentration is controlled at 0.3 mM. (b) The SEM image of AuNR@Fe<sub>2</sub>O<sub>3</sub> nanostructures. (c–h) Corresponding SEM images of resultant AuNR@Fe<sub>2</sub>O<sub>3</sub>@Fe<sub>3</sub>O<sub>4</sub> nanostructures synthesized at pH values of 9, 9.5, 10, 10.5, 11, and 11.5, respectively.

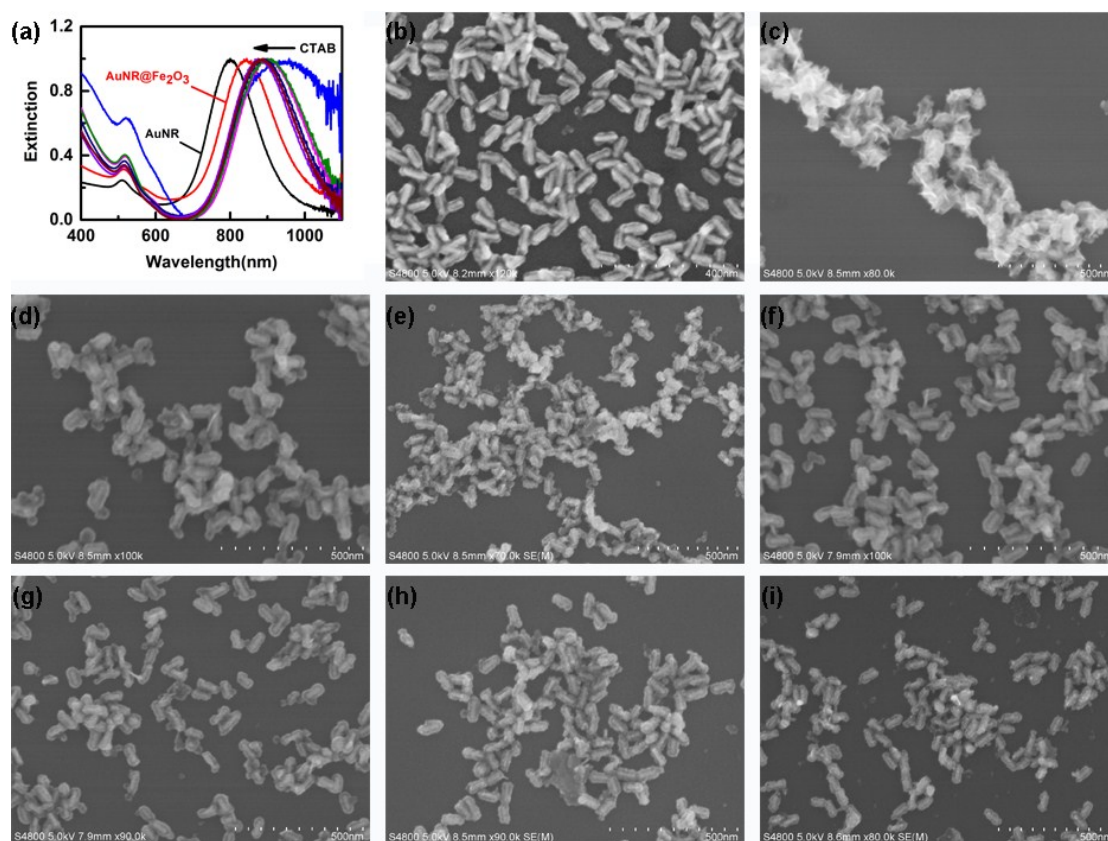

Fig. S5. (a) Normalized extinction spectra recording the encapsulation of Fe<sub>3</sub>O<sub>4</sub> on the surface of AuNR@Fe<sub>2</sub>O<sub>3</sub> nanostructures at various CTAB concentrations. The pH is controlled at 10.5. (b) The SEM image of AuNR@Fe<sub>2</sub>O<sub>3</sub> nanostructures. (c–i) Corresponding SEM images of resultant AuNR@Fe<sub>2</sub>O<sub>3</sub>@Fe<sub>3</sub>O<sub>4</sub> nanostructures synthesized at CTAB concentrations of 0.25, 0.3, 0.4, 0.5, 0.7, 1, and 2 mM, respectively.

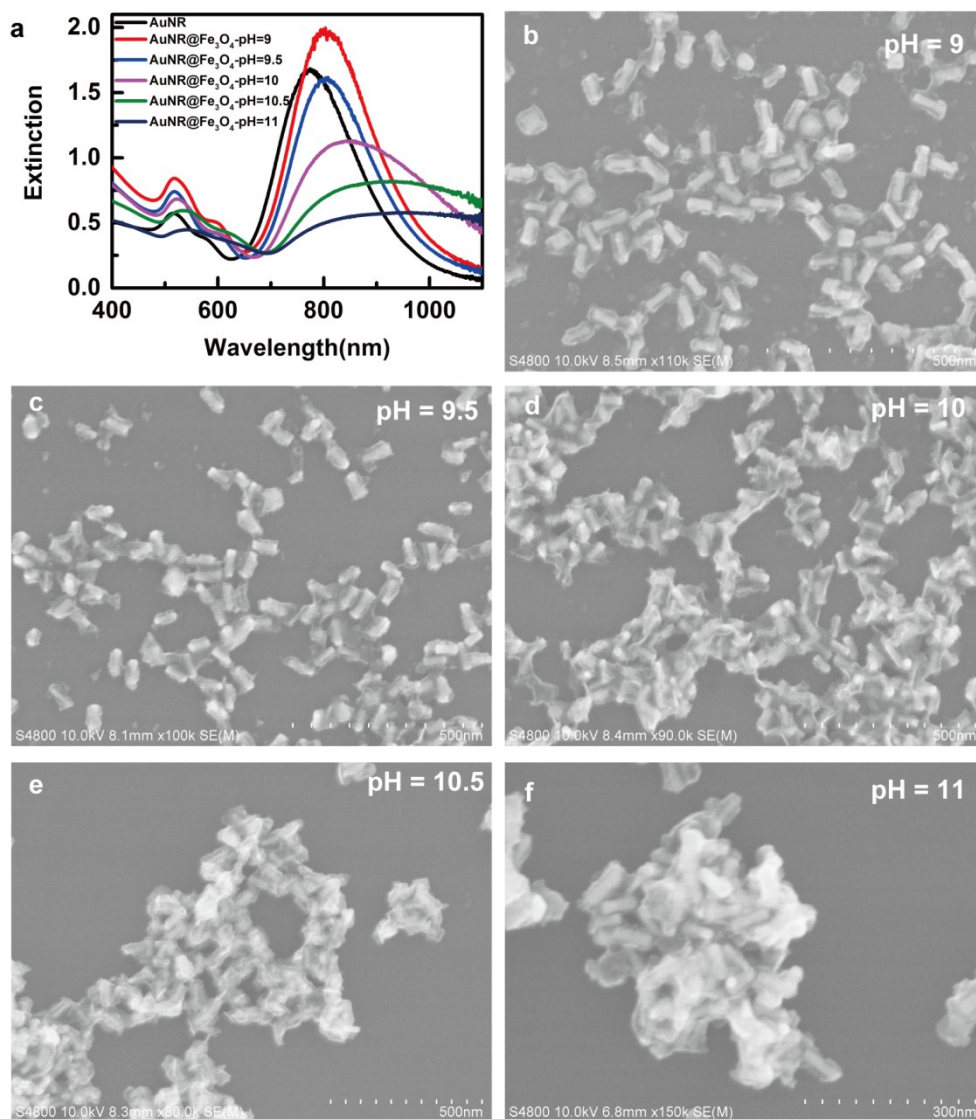

Fig. S6. (a) Extinction spectra recording the encapsulation of Fe<sub>3</sub>O<sub>4</sub> on the surface of AuNRs at various pH values. The CTAB concentration is controlled at 0.15 mM. (b–f) Corresponding SEM images of resultant AuNR@Fe<sub>3</sub>O<sub>4</sub> nanostructures synthesized at pH values of 9, 9.5, 10, 10.5, and 11, respectively.

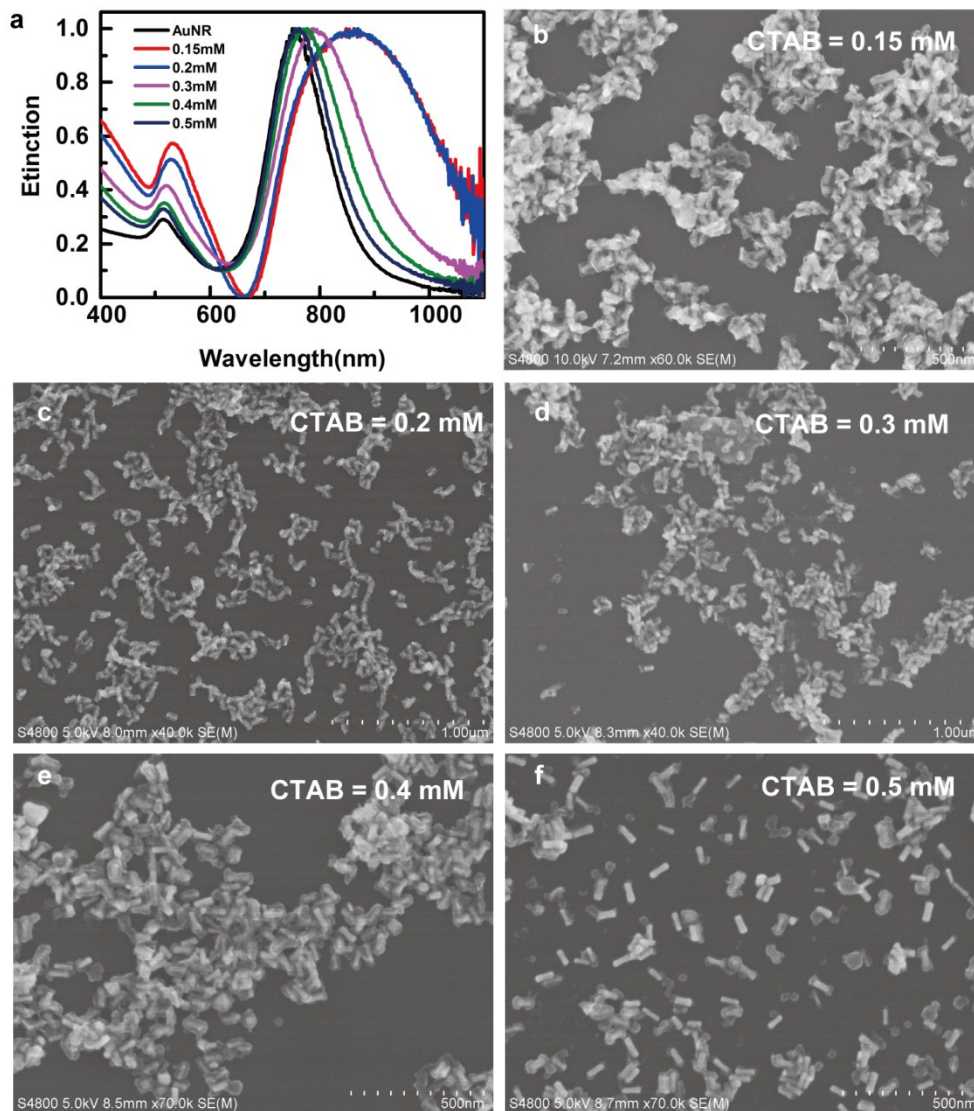

Fig. S7. (a) Normalized extinction spectra recording the encapsulation of Fe<sub>3</sub>O<sub>4</sub> on the surface of AuNRs at various CTAB concentrations. The pH is controlled at 11. (b–f) Corresponding SEM images of resultant AuNR@Fe<sub>3</sub>O<sub>4</sub> nanostructures synthesized at CTAB concentrations of 0.15, 0.2, 0.3, 0.4, and 0.5 mM, respectively.

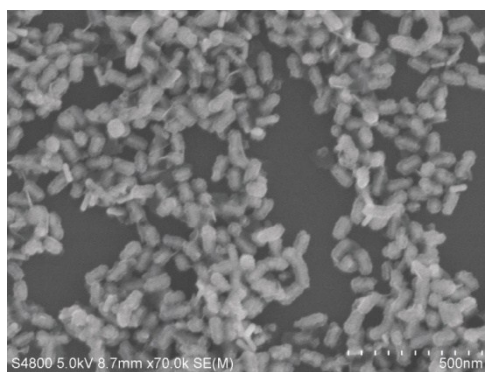

Fig. S8. The SEM image of AuNR@Fe<sub>2</sub>O<sub>3</sub> nanostructures synthesized by adding 300  $\mu$ L of Fe(acac)<sub>3</sub>.

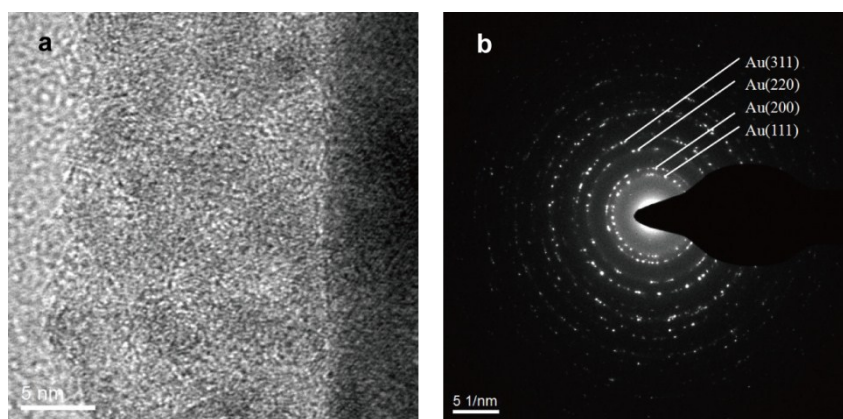

Fig. S9. (a) HRTEM image of the as-prepared AuNR@Fe<sub>3</sub>O<sub>4</sub> nanostructure. (b) SEAD pattern with diffraction rings indexed.

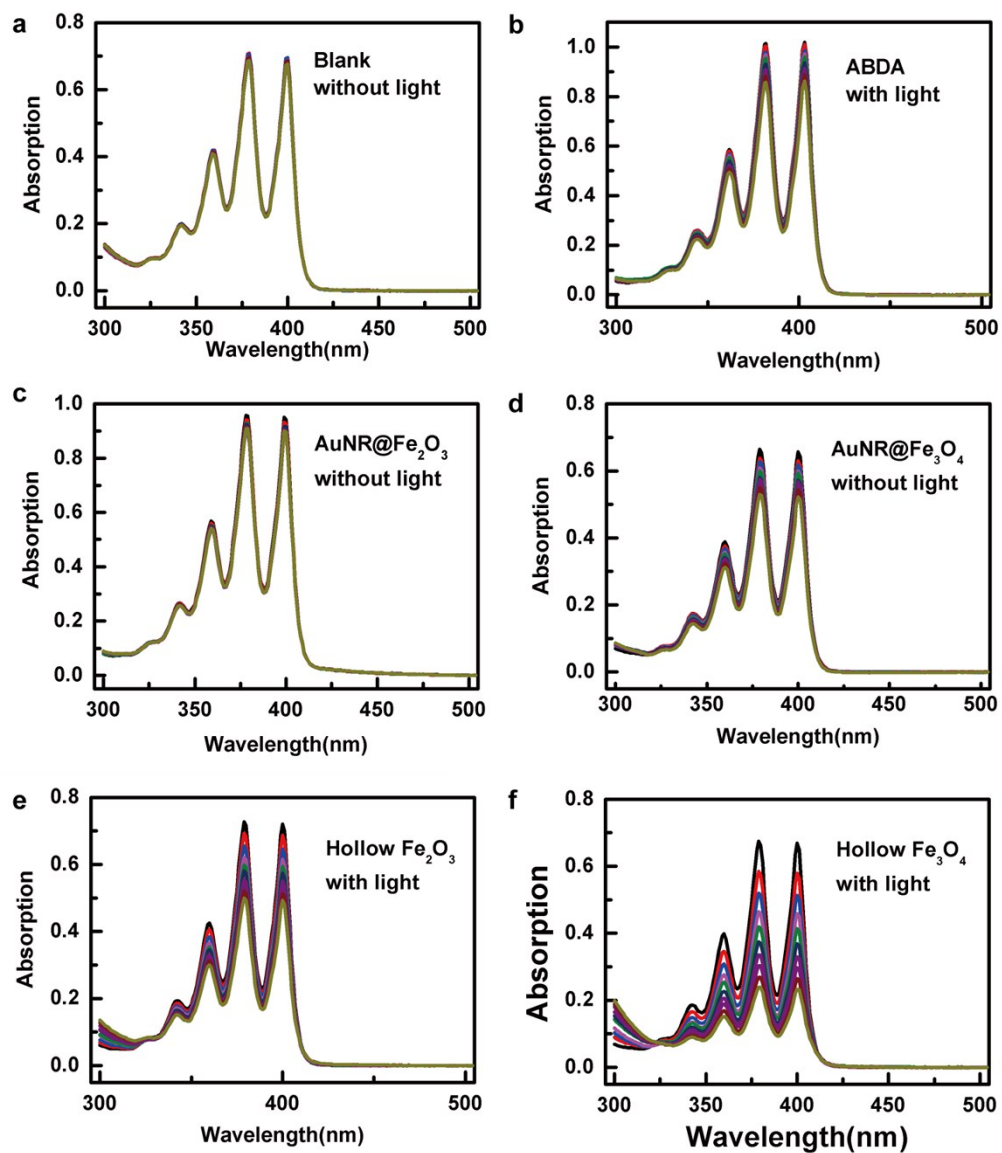

Fig. S10. Evolution of the ABDA absorption spectra of the reference samples.

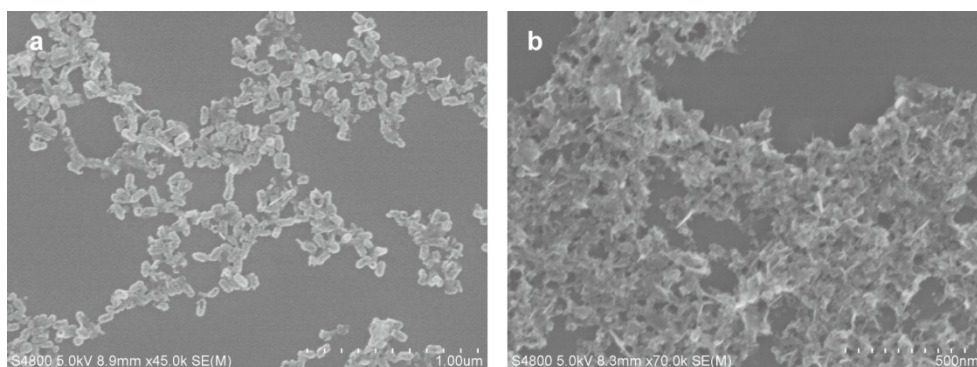

Fig. S11. (a) The SEM image of hollow  $\text{Fe}_2\text{O}_3$  nanostructures. (b) That of hollow  $\text{Fe}_3\text{O}_4$  nanostructures.
